# Supplementary material
Source: PubMed Central journal article supplement (PMC4447520)

## SUPPLEMENTAL MATERIALS

### METHODS

***Subject Recruitment.*** Participation in BetaGene is restricted to Mexican Americans with fasting glucose <126 mg/dl (7 mM) from families of a proband with GDM diagnosed within the previous 5 years. Probands are identified from the patient populations at Los Angeles County/USC Medical Center, OB/GYN clinics at local hospitals, and the Kaiser Permanente health plan membership in Southern California. Probands qualify for participation if they (a) are of Mexican ancestry (both parents and  $\geq 3/4$  of grandparents Mexican or of Mexican descent), (b) have a confirmed diagnosis of GDM within the previous 5 years, (c) have glucose levels associated with poor pancreatic  $\beta$ -cell function and a high risk of diabetes when not pregnant (1), (d) have no evidence of  $\beta$ -cell autoimmunity by GAD-65 testing, and (e) have available for study either 2 non-diabetic siblings and 3 non-diabetic first cousins from a single nuclear family or at least five siblings. Using information from the proband to determine preliminary eligibility, siblings and cousins are invited to participate, as are available parents and connecting uncles and aunts. GDM probands, siblings and cousins have extensive phenotyping for diabetes-related traits (below) and form the basis for the primary analysis of this report.

***Clinical Protocols.*** Phenotyping for BetaGene was performed on two separate visits to the General Clinical Research Center. Visit 1 consists of a physical examination, DNA collection, and a 75 g oral glucose tolerance test (OGTT) with blood samples obtained before and 30, 60, 90, and 120 min after glucose ingestion. Fasting blood samples were also collected for lipid measurements. Participants who had fasting glucose <126 mg/dl on the OGTT were invited for Visit 2, which consisted of a DEXA scan for determination of body fat and an insulin-modified intravenous glucose tolerance test (IVGTT) performed as previously described (4). Probands, their siblings, and their cousins undergo the full phenotyping protocol, while parents, uncles, aunts, spouses, and offspring had only a physical exam, fasting glucose measurement, and DNA collection.

### ***Prioritizing Disease Genes by Analysis of Common Elements***

The “Prioritizing Disease Genes by Analysis of Common Elements” (PDG-ACE) algorithm is a JAVA-based bioinformatic tool developed by the National Center for Integrative Biomedical Informatics (<https://portal.ncibi.org/portal>). In the search for novel complex relationships among disease-related genes, PDG-ACE identifies common over-represented biomedical keywords extracted from NCBI Entrez Gene records describing genes at hypothesized disease-related loci. Biomedical keywords used in the analysis are derived from MeSH, OMIM, and directly from Entrez Gene. Significance of over-representation is established by permutation testing and correction is made for testing multiple hypotheses. In testing the algorithm, expected multi-gene influences are found in documented gene/gene interactions used as positive controls, while no significant influences are seen in randomly selected gene pairs used as negative controls. To date, multi-gene influences have been identified in the etiology of complex diseases ranging from type 2 diabetes mellitus, to breast cancer, to bipolar disorder.

**TABLE S1.** Correlation among QTs. Pair-wise Pearson's correlation coefficient (p-value) are computed among QTs from the BetaGene Study.

|                                                                | BMI<br>(kg/m <sup>2</sup> ) | Fasting<br>Glucose<br>[mM] | 2-hour<br>Glucose<br>[mM] | Fasting<br>Insulin<br>[pM] | 30' D<br>Insulin<br>[pM] | 2-hour<br>Insulin<br>[pM] | S <sub>G</sub><br>[×10 <sup>-2</sup> min <sup>-1</sup> ] | S <sub>I</sub><br>[×10 <sup>-3</sup> min <sup>-1</sup> per pM] | AIR<br>[pM ×10 min] | Disposition<br>Index |
|----------------------------------------------------------------|-----------------------------|----------------------------|---------------------------|----------------------------|--------------------------|---------------------------|----------------------------------------------------------|----------------------------------------------------------------|---------------------|----------------------|
| BMI<br>(Kg/m <sup>2</sup> )                                    | 1.0                         |                            |                           |                            |                          |                           |                                                          |                                                                |                     |                      |
| Fasting Glucose<br>[mM]                                        | 0.29<br>(<0.001)            | 1.0                        |                           |                            |                          |                           |                                                          |                                                                |                     |                      |
| 2-hour Glucose<br>[mM]                                         | 0.28<br>(<0.001)            | 0.49<br>(<0.001)           | 1.0                       |                            |                          |                           |                                                          |                                                                |                     |                      |
| Fasting Insulin<br>[pM]                                        | 0.57<br>(<0.001)            | 0.41<br>(<0.001)           | 0.32<br>(<0.001)          | 1.0                        |                          |                           |                                                          |                                                                |                     |                      |
| 30' D Insulin<br>[pM]                                          | 0.23<br>(<0.001)            | -0.06<br>(0.2298)          | -0.17<br>(<0.001)         | 0.49<br>(<0.001)           | 1.0                      |                           |                                                          |                                                                |                     |                      |
| 2-hour Insulin<br>[pM]                                         | 0.38<br>(<0.001)            | 0.18<br>(<0.001)           | 0.41<br>(<0.001)          | 0.66<br>(<0.001)           | 0.44<br>(<0.001)         | 1.0                       |                                                          |                                                                |                     |                      |
| S <sub>G</sub><br>[×10 <sup>-2</sup> min <sup>-1</sup> ]       | -0.26<br>(<0.001)           | -0.32<br>(<0.001)          | -0.39<br>(<0.001)         | -0.25<br>(<0.001)          | 0.02<br>(0.6967)         | -0.29<br>(<0.001)         | 1.0                                                      |                                                                |                     |                      |
| S <sub>I</sub><br>[×10 <sup>-3</sup> min <sup>-1</sup> per pM] | -0.50<br>(<0.001)           | -0.14<br>(0.0023)          | -0.15<br>(0.0012)         | -0.49<br>(<0.001)          | -0.41<br>(<0.001)        | -0.49<br>(<0.001)         | 0.35<br>(<0.001)                                         | 1.0                                                            |                     |                      |
| AIR<br>[pM ×10 min]                                            | 0.25<br>(<0.001)            | -0.18<br>(<0.001)          | -0.24<br>(<0.001)         | 0.36<br>(<0.001)           | 0.62<br>(<0.001)         | 0.29<br>(<0.001)          | 0.19<br>(<0.001)                                         | -0.36<br>(<0.001)                                              | 1.0                 |                      |
| Disposition<br>Index                                           | -0.22<br>(<0.001)           | -0.40<br>(<0.001)          | -0.49<br>(<0.001)         | -0.16<br>(<0.001)          | 0.22<br>(<0.001)         | -0.19<br>(<0.001)         | 0.55<br>(<0.001)                                         | 0.24<br>(<0.001)                                               | 0.57<br>(<0.001)    | 1.0                  |

**TABLE S2.** Univariate association results in BetaGene. Uncorrected p-values for the test of association between rs1801282 or rs2144908 and QTs are shown.

|                   | <i>PPARG</i> (Pro12 Ala)<br>rs1801282 |                      | <i>HNF4A</i><br>rs2144908 |                      |
|-------------------|---------------------------------------|----------------------|---------------------------|----------------------|
|                   | Age, Sex                              | Age, Sex, and<br>BMI | Age, Sex                  | Age, Sex, and<br>BMI |
| BMI               | 0.3757                                |                      | 0.4444                    |                      |
| Body Fat          | 0.4341                                |                      | 0.8257                    |                      |
| WHR               | 0.9892                                |                      | 0.7440                    |                      |
| Fasting Glucose   | 0.3939                                | 0.4811               | 0.8225                    | 0.5917               |
| 2 hr Glucose      | 0.4385                                | 0.5384               | 0.8089                    | 0.9645               |
| Fasting Insulin   | 0.1764                                | 0.3199               | 0.3869                    | 0.5929               |
| 30' DInsulin      | 0.6662                                | 0.5388               | 0.4597                    | 0.6187               |
| 2-hour Insulin    | 0.5818                                | 0.3741               | 0.4968                    | 0.6576               |
| Total Cholesterol | 0.2363                                | 0.2475               | 0.2723                    | 0.2609               |
| HDL Cholesterol   | 0.0943                                | 0.1167               | 0.7050                    | 0.6369               |
| Triglycerides     | 0.0440                                | 0.0505               | 0.2999                    | 0.2379               |
| S <sub>G</sub>    | 0.7544                                | 0.6513               | 0.2591                    | 0.3214               |
| S <sub>I</sub>    | 0.4324                                | 0.6382               | 0.1689                    | 0.3361               |
| AIR               | 0.7757                                | 0.6051               | 0.4916                    | 0.3230               |
| DI                | 0.4589                                | 0.5342               | 0.0888                    | 0.1151               |

## SUPPLEMENTARY FIGURE LEGEND

**Figure S1.** *HNF4A* Pair-wise Linkage Disequilibrium and Haplotype Block Structure in IRAS FS. LD and haplotype block structure estimated for the 23 *HNF4A* SNPs genotyped in the IRAS FS Mexican American families. Haplotype blocks were determined using the method of Gabriel as implemented in Haploview V3.2. LD is displayed as pair-wise  $r^2$  values, where white indicates  $r^2 = 0$ , varying shades of grey indicate  $0 < r^2 < 1$ , and black indicates  $r^2 = 1$ .

**FIGURE S1**

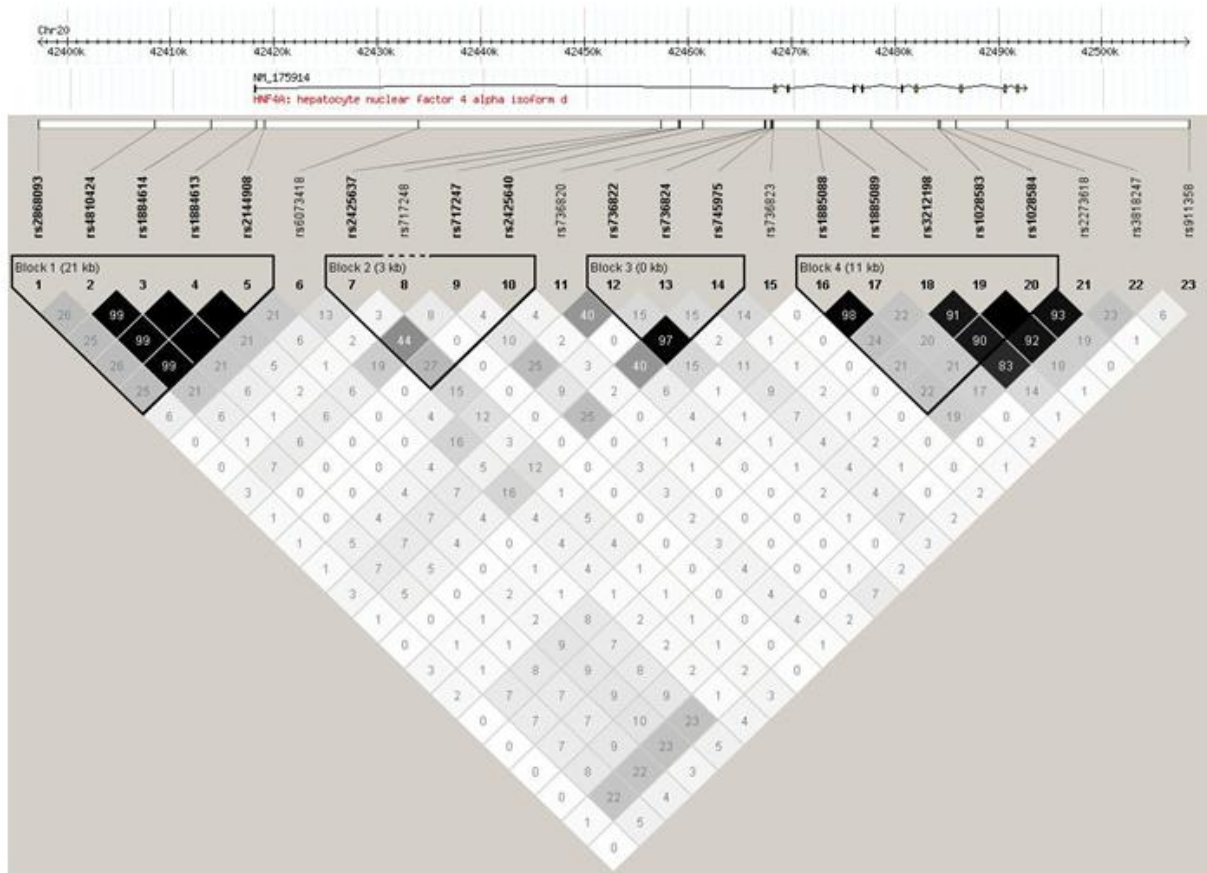

Supplement: NIHMS533612-supplement-supplement_1.pdf [file NIHMS533612-supplement-supplement_1.pdf]
